# Supplementary material
Source: Springer Nature journal article supplement (https://www.springermedizin.de/resource/supplementary/12879_2011_1893_MOESM1_ESM.pdf/9443994)

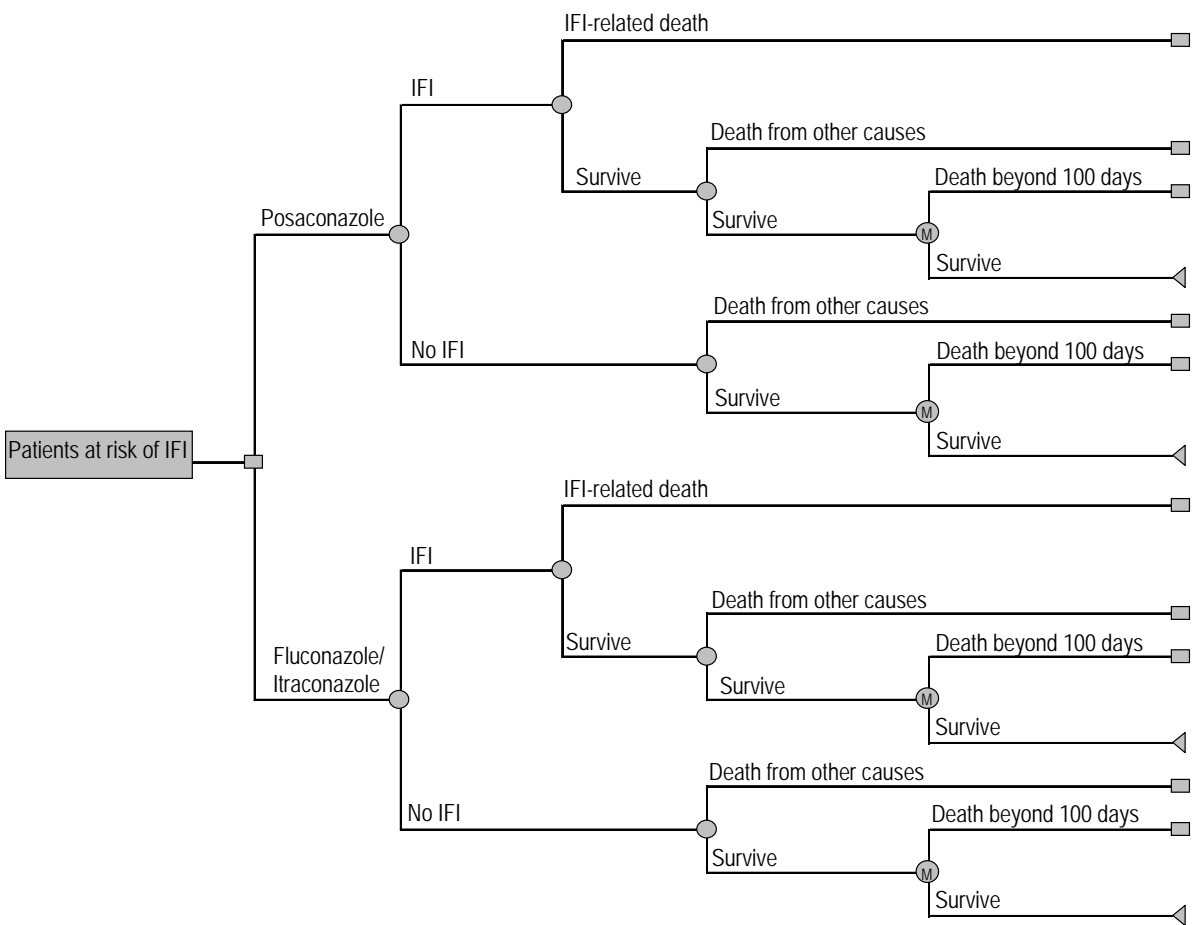

Supplement: MOESM1 [file 9443994]
